# Supplementary material for: Three-dimensional, highly porous N-doped carbon foam as microorganism propitious, efficient anode for high performance microbial fuel cell
Source: Royal Society of Chemistry journal article supplement (doi:10.1039/c6ra01842d), 2016-01-01
Supplement: c6ra01842d1.pdf [file c6ra01842d1.pdf]

1 Supplementary Information

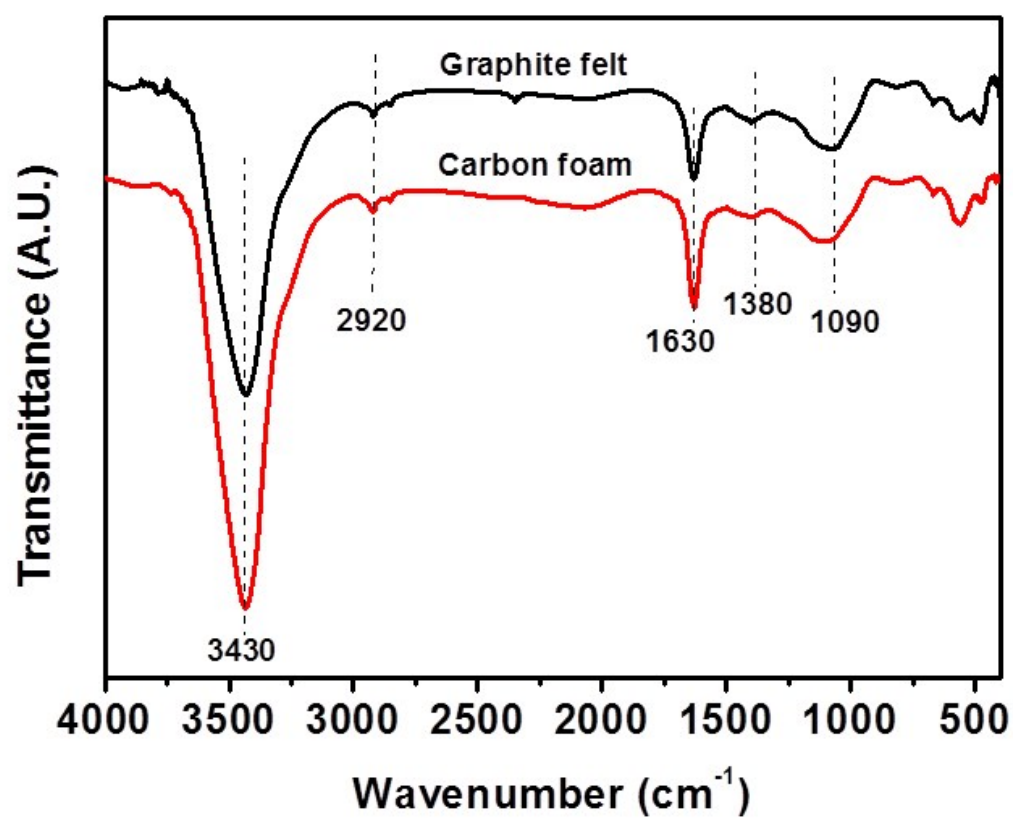

2

3 **Fig. S1** FT-IR spectra of the graphite felt and the as-synthesized carbon foam.
